# Supplementary material for: Binding of Nucleoid-Associated Protein Fis to DNA Is Regulated by DNA Breathing Dynamics
Source: PLoS Comput Biol. 2013 Jan 17;9(1):e1002881. doi: 10.1371/journal.pcbi.1002881 (PMC3547798; doi:10.1371/journal.pcbi.1002881)
Supplement: Table S2 — Summary of previous studies identifying Fis binding sites in the E. coli genome. (XLSX) [file pcbi.1002881.s002.xlsx]

## Sheet: Table S2
Source / Citation	Type	Total Fis binding sites	Total size (bp)	FIS binding sites size (% E.coli genome)
Cho et al. (57)	ChIP-chip assay	894	44700	0.0096
Grainger et al. (56)	ChIP-chip assay	224	11200	0.0024
Kahramanoglou et al. (60)	ChIP-Seq assay performed during different growth phases
	Early-exponential phase	1246	444427	0.096
	Mid-exponential phase	1464	520151	0.112
Keseler et al. (66)	Curated database	261	3896	0.0008
